# Supplementary material
Source: HighWire-hosted journal article supplement (https://openheart.bmj.com/content/suppl/2014/08/16/1.1.e000127)
Supplement: openhrt-2014-000127supp.pdf [file openhrt-2014-000127supp.pdf]

## **Appendix A:**

The following search strategy was used in the PubMed database:

```
((((((((Radiocontrast OR Radiopaque OR Contrast OR Contrast Media[MeSH Terms]))) AND  
(("Kidney Diseases"[Mesh] OR "Kidney"[Mesh] OR "Kidney Function Tests"[Mesh] OR  
Nephroprotective OR Renoprotective OR Nephrotox* OR Glomerulonephritis OR Nephritis OR  
Nephropath* OR Kidney OR Renal OR Creatinine OR "Glomerular Filtration Rate")))) OR  
(("Contrast-induced nephropathy") OR "Contrast nephropathy")) AND ((pitavastatin OR  
simvastatin OR rosuvastatin OR pravastatin OR lovastatin OR fluvastatin OR cerivastatin OR  
atorvastatin OR "Hydroxymethylglutaryl-Coenzyme A" OR Hydroxymethylglutaryl-CoA OR HMG-  
CoA OR statin OR statins OR "Hydroxymethylglutaryl-CoA Reductase Inhibitors"[Mesh] OR  
"Lovastatin"[Mesh] OR "Pravastatin"[Mesh] OR "Simvastatin"[Mesh]))))
```

Search strategies applied in the other databases (Embase, Cochrane Library, Web of Science, and ClinicalTrials.gov) were derived from the PubMed search. The database searches were conducted without using language or publication date restrictions
